# Supplementary material for: The soil microbiomics of intact, degraded and partially-restored semi-arid succulent thicket (Albany Subtropical Thicket)
Source: PeerJ. 2021 Oct 6;9:e12176. doi: 10.7717/peerj.12176 (PMC8501999; doi:10.7717/peerj.12176)
Supplement: Supplemental Information 10 [file peerj-09-12176-s010.xlsx]

## Sheet: TableS2
	RH							Temperature
	Min.	1st Qu.	Median	Mean	3rd Qu.	Max.	sd	Min.	1st Qu.	Median	Mean	3rd Qu.	Max.	sd
Study site	9.568	39.8978	50.5145	57.1196	73.315	100	22.5766	3.608	15.227	18.8255	20.2393	23.521	55.483	7.45145
Intact	9.568	37.7473	49.5695	53.184	64.8445	100	21.4046	6.547	14.76	18.141	19.7349	22.949	50.079	21.4046
Degraded	18.587	38.096	47.871	58.1361	81.635	100	24.8269	3.608	14.447	19.007	21.4137	27.136	55.483	24.8269
Restored	21.322	44.0505	53.618	60.0398	74.9995	100	20.7308	7.515	16.14	19.172	19.5698	22.333	49.908	20.7308
