# Supplementary material for: The soil microbiomics of intact, degraded and partially-restored semi-arid succulent thicket (Albany Subtropical Thicket)
Source: PeerJ. 2021 Oct 6;9:e12176. doi: 10.7717/peerj.12176 (PMC8501999; doi:10.7717/peerj.12176)
Supplement: Supplemental Information 15 [file peerj-09-12176-s015.xlsx]

## Sheet: TableS7
Sites_present	Domain	Phylum	Class	Order	Family	Genus	Species	RA	mean_RA	Status
14	Bacteria	Acidobacteriota	Acidobacteriae	Acidobacteriales	Acidobacteriaceae_(Subgroup_1)	Acidipila-Silvibacterium	NA	0.00378903	0.00115075	Intact
14	Bacteria	Proteobacteria	Gammaproteobacteria	Burkholderiales	Burkholderiaceae	Burkholderia-Caballeronia-Paraburkholderia	NA	0.00166197	0.00115075	Intact
15	Bacteria	Proteobacteria	Alphaproteobacteria	Azospirillales	uncultured	uncultured	NA	0.00149983	0.00123679	Degraded
14	Bacteria	Actinobacteriota	Actinobacteria	Micrococcales	Micrococcaceae	Arthrobacter	NA	0.00153191	0.00123679	Degraded
5	Bacteria	Proteobacteria	Alphaproteobacteria	Sphingomonadales	Sphingomonadaceae	Parablastomonas	NA	0.000503298	0.00128865	Partially_restored
5	Bacteria	Proteobacteria	Alphaproteobacteria	Caulobacterales	Caulobacteraceae	Brevundimonas	NA	0.000814744	0.00128865	Partially_restored
5	Bacteria	Verrucomicrobiota	Verrucomicrobiae	Opitutales	Opitutaceae	Lacunisphaera	NA	0.00133548	0.00128865	Partially_restored
5	Bacteria	Actinobacteriota	Actinobacteria	Micrococcales	Microbacteriaceae	Galbitalea	NA	0.000852118	0.00128865	Partially_restored
5	Bacteria	Bacteroidota	Bacteroidia	Cytophagales	Microscillaceae	Chryseolinea	NA	0.0012109	0.00128865	Partially_restored
5	Bacteria	Proteobacteria	Gammaproteobacteria	Xanthomonadales	Rhodanobacteraceae	Pseudofulvimonas	NA	0.00049084	0.00128865	Partially_restored
5	Bacteria	Bacteroidota	Bacteroidia	Cytophagales	Microscillaceae	Hassallia	NA	0.000882017	0.00128865	Partially_restored
